# Supplementary material for: Distributions and Direct Radiative Effects of Different Aerosol Types in North China
Source: MDPI journal article supplement (doi:10.3390/rs15235511), 2023-11-27
Supplement: s1 [file s1]

## Supplementary Materials

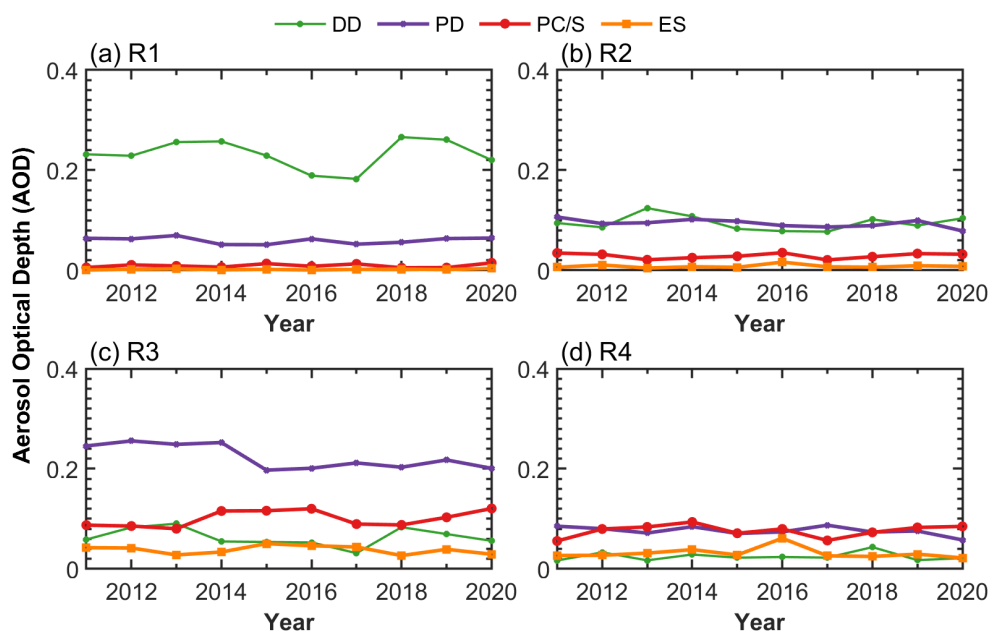

**Figure S1.** The annual AOD variations for the four aerosol types in regions.

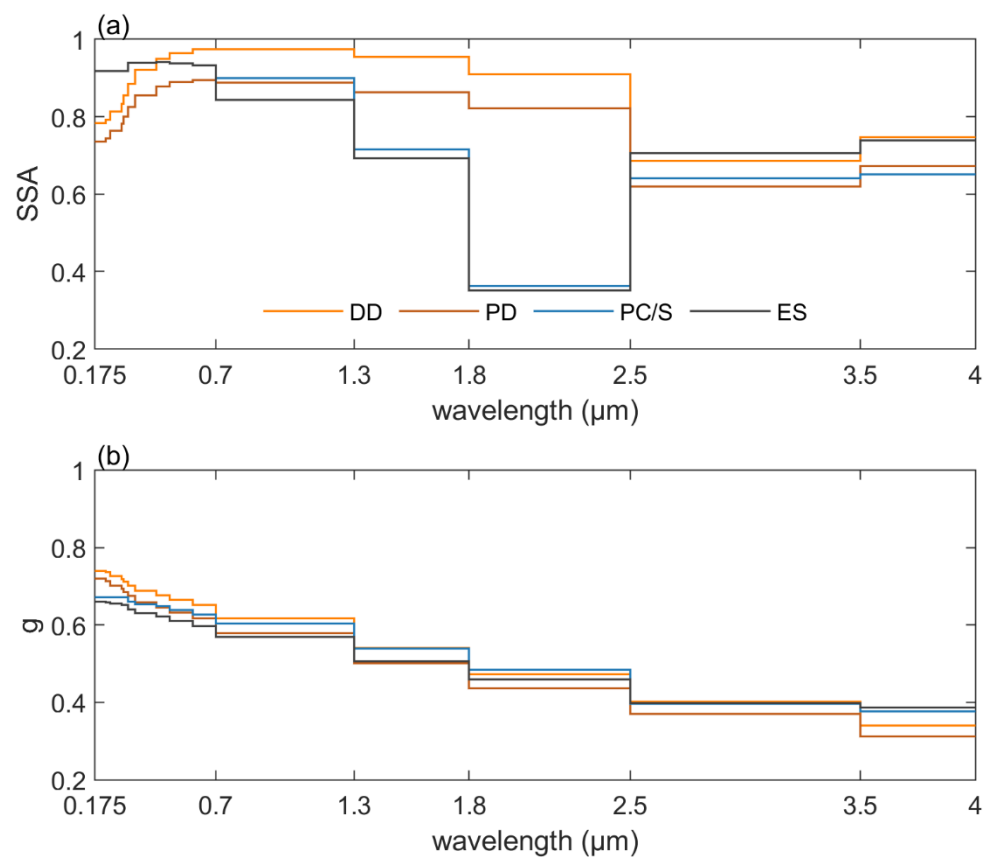

**Figure S2.** The value of SSA (a) and g (b) at sub-bands of SW.
